# Supplementary material for: Optimization of probiotic therapeutics using machine learning in an artificial human gastrointestinal tract
Source: PubMed Central journal article supplement (PMC7806704; doi:10.1038/s41598-020-79947-y), 2021-01-13
Supplement: 41598_2020_79947_MOESM1_ESM.pdf [file 41598_2020_79947_MOESM1_ESM.pdf]

## **Supplementary Materials**

### **Optimization of Probiotic Therapeutics using Machine Learning in an Artificial Human Gastrointestinal Tract**

Susan Westfall<sup>1</sup>, Francesca Carracci<sup>1</sup>, Molly Estill<sup>1</sup>, Danyue Zhao<sup>3</sup>, Qing-li Wu<sup>3</sup>, Li Shen<sup>1</sup>,  
James Simon<sup>3</sup>, Giulio Maria Pasinetti<sup>1,2,\*</sup>

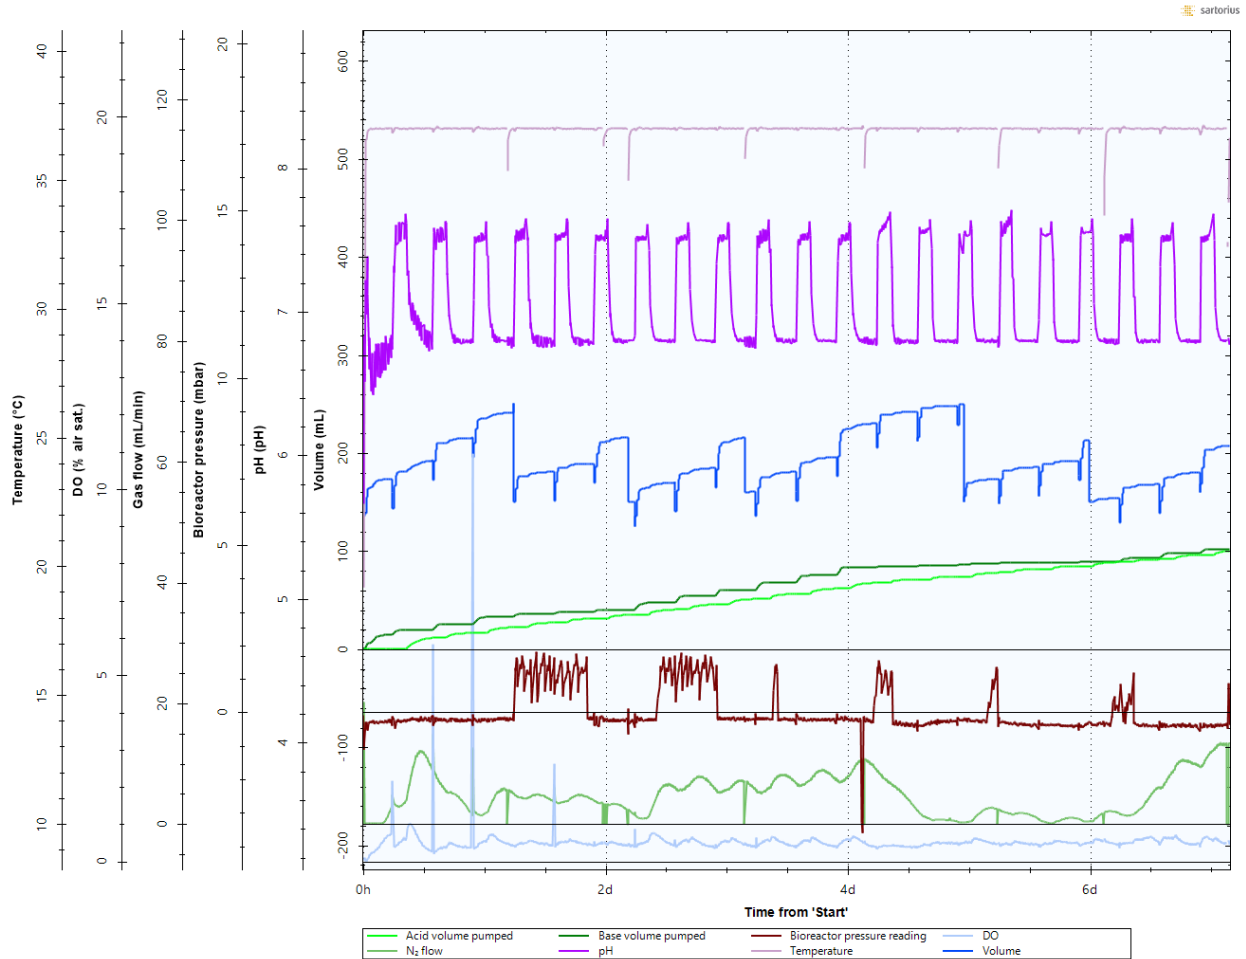

**Supplementary Figure 1: Representative Conditions of the ABIOME.** The ambr250 unit allows the real-time monitoring of all parameters inside the bioreactor allowing quality control to be conducted throughout each experiment. This includes temperature regulation (light purple), pH (pink), overall volume (blue), acid (dark green) and base (light green) volumes pumped, bioreactor pressure (brown), nitrogen gas flow (green) and deoxygenation (DO) level (light blue). The cyclic pH read out confirms the alterations between the feeding cycle and ileum incubation at pH 6.7, which is in line with the changes in volume associated with feeding. Small variations in the DO represent the small amount of oxygenation which is introduced into the bioreactor along with the food and pancreatic solution inputs while large dips in the total volume are due to manual corrections to maintain the bioreactor at 150 mL working volume.

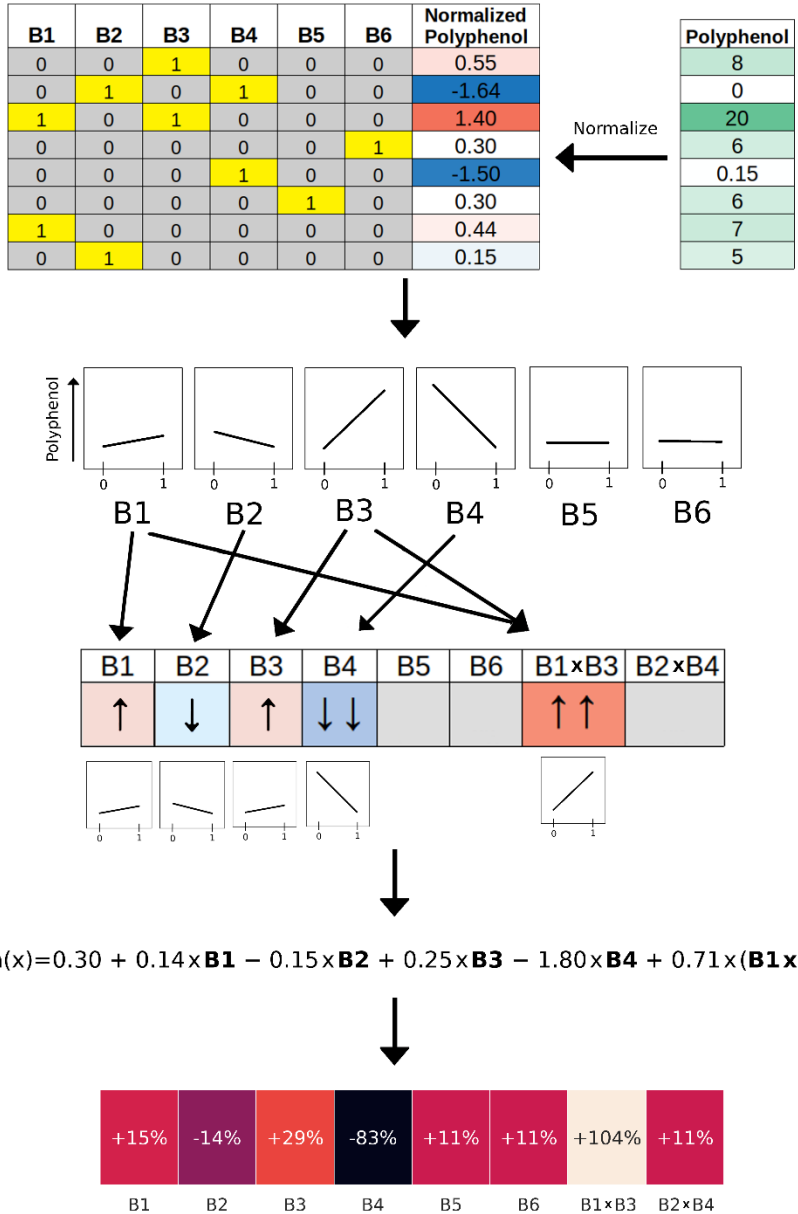

**Supplementary Figure 2:** Different bacterial combinations yield result in varying amounts of a given polyphenol. In the example matrix, the presence or absence of a bacterial strains is indicated with a “1” (in yellow), or “0” (in grey), respectively. Administration of the bacterial combinations shown produced a resulting polyphenol level, which was log-transformed and normalized for use in MARS. For each polyphenol, MARS first examines the response of the polyphenol level to the presence or absence (1 or 0) of the six individual bacterial strains (B1-6). In this example, B5 and 6 are not predictors of the polyphenol. The presence of B1 weakly predicts an increase in polyphenol, while the presence of B2 weakly predicts an decrease in polyphenol. Both B3 and B4 strongly predict polyphenol level, with the presence of B3 yielding an increase in polyphenol, and the presence of B4 yielding a decrease in polyphenol. MARS then investigates the possible interactions between the individual bacterial strains, which are limited

in this example dataset to the interaction of B1xB3 and B2xB4. Based on the influence of the individual formula terms on the polyphenol response, non-informative terms are removed from the formula. In this example, B5, B6, and the interaction of B2 and B4 (B2xB4) do not predict the polyphenol response, and are thus excluded from the final model. The model coefficients are then extracted and normalized.

**Supplementary Table 1. Details of phenolic compounds included in the updated LC-QqQ MS/MS analysis.**

| No. | Compound Name                                      | Abbreviation | Molecular Weight |
|-----|----------------------------------------------------|--------------|------------------|
| 1   | Gallic acid                                        | GA           | 170.12           |
| 2   | Pyrogallol                                         | PG           | 126.11           |
| 3   | 4-Hydroxyhippuric acid                             | 4-HHA        | 195.17           |
| 4   | Delphinidin-3-O-glucoside                          | D3Glc        | 465.39           |
| 5   | 3,4-Dihydroxybenzoic acid                          | 3,4-diHBA    | 154.12           |
| 6   | 3-Hydroxyhippuric acid                             | 3-HHA        | 195.17           |
| 7   | 3,4-Dihydroxyphenylacetic acid                     | 3,4-diHPAA   | 168.15           |
| 8   | 4-O-Methylgallic acid                              | 4-MeGA       | 184.15           |
| 9   | Cyanidin-3-glucoside                               | C3Glc        | 449.39           |
| 10  | 4-Hydroxybenzoic acid                              | 4-HBA        | 138.12           |
| 11  | Catechin                                           | C            | 290.26           |
| 12  | Hippuric acid                                      | HA           | 179.12           |
| 13  | Malvidin                                           | Mvd          | 331.30           |
| 14  | 4-Hydroxyphenylacetic acid                         | 4-HPAA       | 152.15           |
| 15  | 3-(3,4-Dihydroxyphenyl)propionic acid              | 3,4-diHPPA   | 182.17           |
| 16  | Vanillic acid                                      | VA           | 168.15           |
| 17  | Malvidin-3-glucoside                               | M3Glc        | 493.44           |
| 18  | Caffeic acid                                       | CA           | 180.16           |
| 19  | 3-Hydroxybenzoic acid                              | 3-HBA        | 138.12           |
| 20  | Proanthocyanidin dimer B2                          | PAC-B2       | 576.51           |
| 21  | 3-Hydroxyphenylacetic acid                         | 3-HPAA       | 152.15           |
| 22  | Homovanillic acid                                  | HVA          | 182.17           |
| 23  | Phloroglucinaldehyde                               | PGA          | 154.12           |
| 24  | Epicatechin                                        | EC           | 290.26           |
| 25  | 5-(3',4'-Dihydroxyphenyl)- $\gamma$ -valerolactone | DHVL         | 208.21           |

|    |                                     |            |        |
|----|-------------------------------------|------------|--------|
| 26 | 3-(4-Hydroxyphenyl)propionic acid   | 4-HPPA     | 166.17 |
| 27 | 4-Hydroxycinnamic acid              | 4-HCA      | 164.17 |
| 28 | O-Methyl epicatechin                | Me-EC      | 304.30 |
| 29 | Dihydroferulic acid                 | DHFA       | 196.21 |
| 30 | 3-(3-Hydroxyphenyl)propionic acid   | 3-HPPA     | 166.17 |
| 31 | Ferulic acid                        | FA         | 194.18 |
| 32 | 3-Hydroxycinnamic acid              | 3-HCA      | 164.16 |
| 33 | Phenylacetic acid                   | PA         | 136.15 |
| 34 | 5-(3,4-Dihydroxyphenyl)valeric acid | 3,4-diHPVA | 210.23 |
| 35 | Myricetin                           | MYR        | 318.24 |
| 36 | t-Resveratrol (-)                   | RSV        | 228.25 |
| 37 | Dihydroresveratrol                  | DHRSV      | 230.26 |
| 38 | 5-(4-Hydroxyphenyl)valeric acid     | 4-HPVA     | 194.23 |
| 39 | 5-(3-Hydroxyphenyl)valeric acid     | 3-HPVA     | 194.23 |
| 40 | Quercetin                           | QUER       | 302.26 |
| 41 | Kaempferol                          | KAMF       | 286.23 |
| 42 | Isorhamnetin                        | 3'-MeQUER  | 316.27 |
| 43 | Rhamnetin                           | 7-MeQUER   | 316.27 |
| 44 | 4-hydroxybenzoic-2,3,5,6-d4         | IS#1       | 142.12 |
| 45 | <i>Trans</i> -cinnamic acid-d7      | IS#2       | 155.16 |

---

**Supplementary Table 2: Relative Gene Expression of Major Bacterial Groups in Response to Bacterial Combinations**

| <b>BDPP</b>     |          |          |          |
|-----------------|----------|----------|----------|
| <b>Combo 1</b>  | Lp793    | B115707  |          |
| <b>Combo 2</b>  | Lp126A7  | B11507   |          |
| <b>Combo 3</b>  | Lp793    | B115707  | Lp126A7  |
| <b>Combo 4</b>  | Lp793    | Lr126C6  |          |
| <b>Combo 5</b>  | Lp793    | Lr126C6  | Ba114B10 |
| <b>Combo 6</b>  | Ls126D10 | Ba114B10 |          |
| <b>Combo 7</b>  | Ls126D10 | Lp793    | Lr126C6  |
| <b>Combo 8</b>  | B115707  | Ls126D10 |          |
| <b>Combo 9</b>  | Ls126D10 | B115707  | Lp126A7  |
| <b>Combo 10</b> | B115707  | Lr126C6  | Lp793    |
| <b>Combo 11</b> | Lp126A7  | Lr126C6  | Ls126D10 |
| <b>Combo 12</b> | Lr126C6  | Ls126D10 |          |
